# Supplementary material
Source: Springer Nature journal article supplement (https://www.springermedizin.de/resource/supplementary/12960_2009_236_MOESM2_ESM.pdf/9570706)

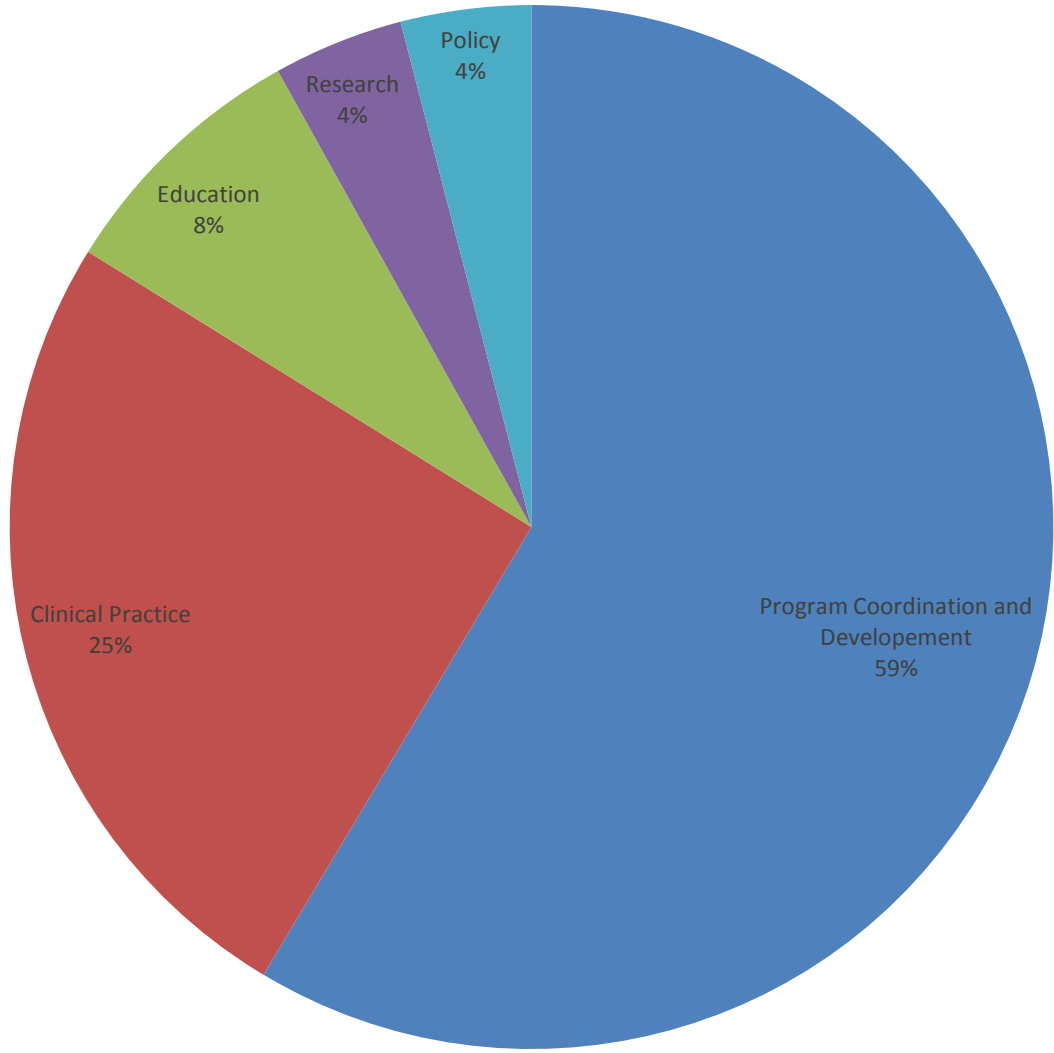

Supplement: MOESM2 [file 9570706]
